# Supplementary material for: Tablet Splitting in Elderly Patients with Dementia: The Case of Quetiapine
Source: MDPI journal article supplement (doi:10.3390/pharmaceutics13091523), 2021-09-20
Supplement: s1 [file s1]

## Supplementary Materials: Tablet Splitting in Elderly Patients with Dementia: The Case of Quetiapine

Roberta Ganzetti, Serena Logrippo, Matteo Sestili, Alessandro Caraffa, Marco Cespi, Giuseppe Pelliccioni, Paolo Blasi and Giulia Bonacucina

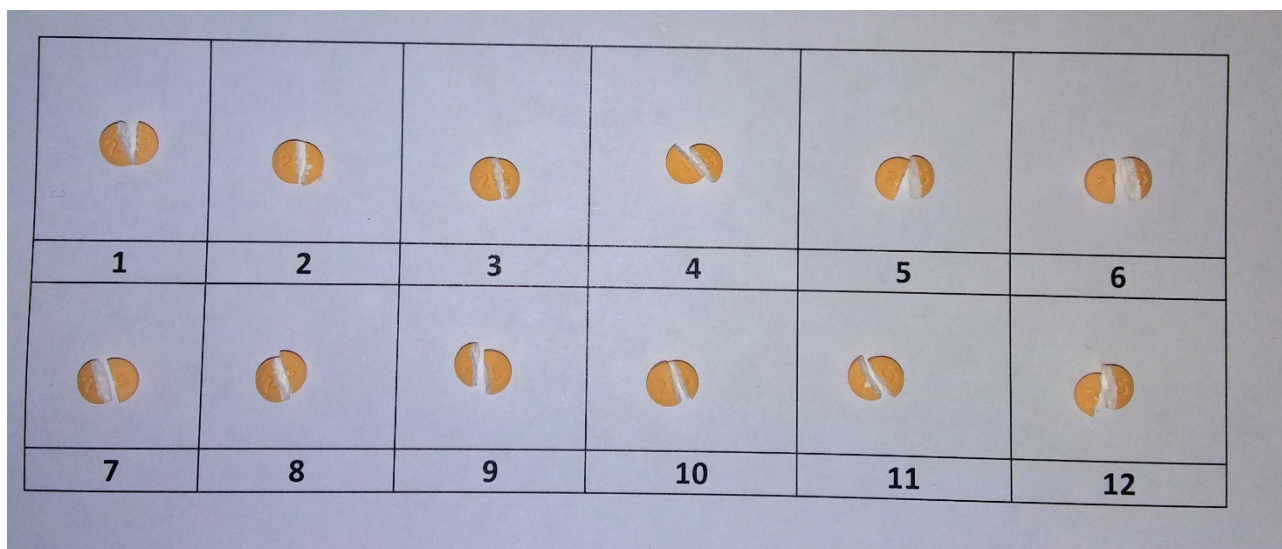

**Figure S1.** Sample picture of twelve split tablets (25 mg quetiapine fumarate) positioned inside a specific grid to select the samples for analysis.
